# Supplementary material for: Genetic Influences on Metabolite Levels: A Comparison across Metabolomic Platforms
Source: PLoS One. 2016 Apr 13;11(4):e0153672. doi: 10.1371/journal.pone.0153672 (PMC4830611; doi:10.1371/journal.pone.0153672)
Supplement: S4 Table — (XLSX) [file pone.0153672.s004.xlsx]

## Sheet: TABLE S4
S4 Table. GWAS Results for Biocrates and Metabolon with threshold (5e-8)
Biocrates													Metabolon
chr	rs	ps	n_miss	beta	se	l_remle	l_mle	p_wald	p_lrt	p_score	metabolite	gene	chr	rs	ps	n_miss	beta	se	l_remle	l_mle	p_wald	p_lrt	p_score	metabolite	gene
													1	rs4646493	47053889	0	0.427739	0.0627107	1.83055	1.83951	9.0509e-12	1.47628e-11	2.64031e-11	10-undecenoate (11:1n1)	CYP4B1
1	rs7529802	49002572	33	-0.0829931	0.0145839	5.63251	5.71602	1.26481e-08	1.50684e-08	1.96502e-08	pc aa c34 1	AGBL4
													1	rs211718	75879263	42	-0.279523	0.0508367	1.67274	1.68148	3.83136e-08	4.48956e-08	5.67625e-08	X- 11421	ACADM
1	rs4949874	75934477	8	-0.0496002	0.00751635	2.25912	2.27267	4.14022e-11	5.90528e-11	9.47516e-11	c6	ACADM	1	rs4949874	75934477	8	-0.347239	0.0470712	2.75883	2.77709	1.6203e-13	2.9936e-13	6.22937e-13	hexanoylcarnitine	ACADM
1	rs2172507	76103908	1	-0.0468077	0.00839303	2.97436	2.99796	2.44744e-08	2.85557e-08	3.64606e-08	c8	ACADM	1	rs4949874	75934477	8	-0.314559	0.0474492	2.32846	2.34382	3.37102e-11	4.88562e-11	7.82704e-11	octanoylcarnitine	ACADM
													1	rs6701819	149807786	33	0.508981	0.0909463	2.64472	2.65991	2.18717e-08	2.8317e-08	3.90213e-08	X- 02249	TUFT1
2	rs4665272	24803841	18	-0.0968268	0.016019	6.0726	6.15953	1.49894e-09	1.9761e-09	2.84813e-09	pc aa c40 4	NCOA1
2	rs4665272	24803841	19	-0.0882563	0.0152804	9.16521	9.28648	7.65921e-09	9.5032e-09	1.28331e-08	pc ae c40 5	NCOA1
													2	rs1260326	27584444	0	-0.311011	0.0429757	1.23146	1.23639	4.59086e-13	8.32898e-13	1.67659e-12	mannose	GCKR
													2	rs10169714	73662281	3	-0.865421	0.0401384	2.23274	2.24431	4.18358e-103	1.02692e-81	3.62761e-66	N-acetylornithine	NAT8
													2	rs7558944	73664417	4	-0.506089	0.0542796	1.84283	1.85157	1.12325e-20	1.1224e-19	1.09531e-18	X- 11787	NAT8
													2	rs13410232	73725197	27	-0.492072	0.0572001	2.86502	2.89271	7.79011e-18	5.29422e-17	3.59662e-16	X- 12510	NAT8
													2	rs13410232	73725197	15	0.445082	0.0694155	0.575165	0.592936	1.43765e-10	2.58959e-10	5.3984e-10	X- 12093	NAT8
													2	rs6751877	101342584	2	-0.786356	0.0778833	100000	100000	5.71918e-24	7.34302e-08	0.000331374	N-(2-furoyl)glycine	CREG2
													2	rs332889	117562854	22	0.267769	0.0481562	1.92621	1.93631	2.69123e-08	3.58749e-08	5.07494e-08	laurate (12:0)	NA
2	rs7588481	137365673	44	-0.0616249	0.0110702	6.10153	6.19423	2.59572e-08	3.19939e-08	4.24178e-08	pc aa c38 3	THSD7B
													2	rs355829	165324561	1	-0.321105	0.0587946	0.486421	0.487642	4.72212e-08	5.52851e-08	6.95725e-08	1-stearoylglycerophosphocholine	COBLL1
2	rs7601356	210764902	10	0.116366	0.00906231	4.2665	4.30936	9.6999e-38	4.86809e-35	1.94195e-32	c9	ACADL	2	rs12612970	210715532	9	0.508181	0.0490203	2.46496	2.50177	3.51238e-25	1.5012e-23	6.43613e-22	X- 13431	ACADL
2	rs4673553	211316624	0	0.0551379	0.00657924	7.6285	7.71646	5.26656e-17	1.48497e-16	4.8487e-16	gly	CPS1	2	rs4673553	211316624	0	0.437266	0.0407403	4.06074	4.08618	7.12323e-27	1.47148e-25	3.14678e-24	glycine	CPS1
													2	rs4673553	211316624	0	0.348452	0.051763	1.40857	1.41507	1.67723e-11	2.53479e-11	4.23034e-11	X- 08988	CPS1
													2	rs2741046	234244988	2	0.355226	0.0607603	0.623866	0.633925	5.02493e-09	7.44302e-09	1.20557e-08	bilirubin (E,Z or Z,E)*	UGT1A10
													2	rs887829	234333309	5	0.432221	0.0558672	0.571963	0.578673	1.02129e-14	2.62559e-14	7.63742e-14	X- 11530	UGT1A10
													2	rs887829	234333309	6	0.432132	0.055883	1.91987	1.92949	1.0521e-14	2.81233e-14	8.1411e-14	X- 11793	UGT1A10
													2	rs4148325	234338048	7	0.457712	0.0486274	2.74747	2.76758	4.83854e-21	4.85813e-20	4.90419e-19	bilirubin (Z,Z)	UGT1A10
													2	rs4148325	234338048	7	0.374089	0.0510674	1.19406	1.19889	2.38187e-13	5.24099e-13	1.2567e-12	bilirubin (E,E)*	UGT1A10
													2	rs4148325	234338048	4	0.366276	0.0656498	1.09906	1.14321	2.4157e-08	5.0826e-08	1.08496e-07	biliverdin	UGT1A10
3	rs6810358	11136938	10	0.0489975	0.00893895	3.0856	3.11378	4.22105e-08	4.8755e-08	6.13963e-08	c10	NA
													3	rs2712423	129773628	0	0.295898	0.0541148	0.944233	0.952817	4.5524e-08	5.54889e-08	7.41849e-08	X- 04498	C3orf27
													3	rs1055690	142948837	0	-1.01795	0.176485	0.780433	1.008	8.02644e-09	2.25722e-08	7.93459e-08	X- 14632	NA
													3	rs9864094	168642525	2	1.36014	0.125102	100000	100000	1.56272e-27	2.7595e-07	0.000629853	X- 12435	SERPINI2
													4	rs737267	9543842	0	-0.422839	0.0462097	2.73119	2.75012	5.67043e-20	3.29983e-19	2.05175e-18	urate	SLC2A9
													4	rs7439210	9580847	13	0.384916	0.0614529	1.72315	1.73317	3.76204e-10	6.18794e-10	1.08421e-09	histidine	SLC2A9
													4	rs3099557	22433119	0	0.465963	0.0613086	2.54578	2.57179	2.955e-14	7.48525e-14	2.09182e-13	X- 11818	GBA3
4	rs17005448	123192512	12	-0.0538324	0.00923408	6.37266	6.45027	5.55087e-09	6.69862e-09	8.96427e-09	tryptophan	NA
4	rs17005448	123192512	12	-0.0484052	0.00871939	3.62944	3.66988	2.83322e-08	3.28586e-08	4.1699e-08	histidine	NA
4	rs10516614	123193143	0	-0.0647523	0.0114272	7.89177	7.99412	1.45742e-08	1.74208e-08	2.27337e-08	phenylalanine	NA
4	rs11132844	168194967	20	-0.120634	0.0200259	78.4605	80.1965	1.70244e-09	2.36387e-09	3.48064e-09	h1	SPOCK3
													5	rs274552	131755245	33	-0.407359	0.0639855	3.34045	3.37475	1.93471e-10	3.12409e-10	5.40657e-10	X- 11255	SLC22A5
													5	rs1549897	144243044	8	-0.716656	0.0887974	781.383	100000	4.99053e-08	3.47355e-05	0.0529644	3-(cystein-S-yl)acetaminophen*	NA
													5	rs2731672	176775080	0	-0.356799	0.0498294	1.85738	1.87424	8.04327e-13	1.71098e-12	3.9655e-12	X- 11792	F12
													6	rs633290	4059787	4	0.275036	0.0493841	1.17064	1.18099	2.55723e-08	3.29829e-08	4.66121e-08	X- 13435	PECI C6orf201
													6	rs494562	86173848	0	0.427272	0.074119	9.11758	9.21347	8.18163e-09	1.10717e-08	1.59911e-08	inosine	NA
													6	rs9373342	100604512	1	0.254395	0.0450706	3.49151	3.51568	1.65779e-08	1.98416e-08	2.56044e-08	X- 11469	MCHR2-AS1
													6	rs1564348	160498850	0	-0.388251	0.0653905	3.26941	3.29113	2.89548e-09	3.6248e-09	4.9344e-09	isobutyrylcarnitine	SLC22A1
													6	rs316020	160589071	5	-1.01756	0.0812763	2.07049	2.08639	5.82271e-36	5.25578e-33	2.70259e-30	X- 12798	SLC22A2
7	rs17171540	39120420	33	-0.0573833	0.0105171	5.55923	5.64185	4.864e-08	5.85598e-08	7.58101e-08	arginine	POU6F2
7	rs181028	87985924	12	-0.050468	0.00916991	1.29619	1.30422	3.72009e-08	4.38309e-08	5.62596e-08	c5	NA
													7	rs11974702	99001887	13	-0.778487	0.076929	7.48937	7.55246	4.52516e-24	4.90039e-23	5.69188e-22	androsterone sulfate	CYP3A5
													7	rs11974702	99001887	13	-0.64513	0.0788942	7.49625	7.5628	2.9063e-16	8.05178e-16	2.46972e-15	epiandrosterone sulfate	CYP3A5
													7	rs1859690	99065108	0	-0.906745	0.10553	6.22352	6.29913	8.52284e-18	4.51206e-17	2.42135e-16	X- 12063	CYP3A5
													7	rs1872929	137451953	0	-0.301468	0.0550814	1.78558	1.79551	4.42131e-08	7.05518e-08	1.15598e-07	X- 12844	AKR1D1
													7	rs17160622	138270200	29	-0.655059	0.114867	0.108663	0.111645	1.17883e-08	1.65725e-08	2.53974e-08	1-stearoylglycerol (1-monostearin)	KIAA1549
													8	rs2097585	18063184	0	-0.450713	0.0823769	0.889428	0.942293	4.4661e-08	7.56234e-08	1.49532e-07	X- 13215	NA
													8	rs4921913	18316657	5	-0.359259	0.061914	1.39851	1.43085	6.53154e-09	9.32938e-09	1.51385e-08	1-methylxanthine	NA
													8	rs1495743	18317580	12	0.322599	0.0556302	1.04927	1.05797	6.67178e-09	1.09561e-08	1.9454e-08	4-acetamidobutanoate	NA
													8	rs952858	20076882	11	0.343383	0.0552195	0.564807	0.582927	5.01919e-10	9.31447e-10	1.97377e-09	1-methylurate	SLC18A1
8	rs4734517	102187188	0	-0.0472583	0.00843912	2.32658	2.34292	2.14463e-08	2.68289e-08	3.64049e-08	c2	NA
													8	rs11780874	145221292	2	-0.430277	0.0619862	3.51966	3.54444	3.87966e-12	6.17012e-12	1.08717e-11	5-oxoproline	OPLAH
9	rs3844046	131505058	0	-0.0900446	0.0163213	3.45207	3.48796	3.44852e-08	4.04896e-08	5.1754e-08	pc aa c36 5	PRRX2
10	rs11010004	19778400	10	-0.0970354	0.0157212	3.02933	3.05851	6.73144e-10	9.12247e-10	1.36469e-09	c3	C10orf112
10	rs11010603	19919591	2	-0.0731543	0.0128882	5.57435	5.63794	1.37817e-08	1.64309e-08	2.14275e-08	pc aa c34 2	LOC100128641
10	rs10508588	19954902	3	-0.0664837	0.01107	3.82353	3.87131	1.90444e-09	2.43221e-09	3.41983e-09	valine	LOC100128641
10	rs10508588	19954902	3	-0.0672665	0.0113476	3.65849	3.70196	3.07024e-09	3.7955e-09	5.17835e-09	xleu	LOC100128641
10	rs1171614	61139544	6	-0.0417963	0.006044	3.23755	3.28066	4.66779e-12	8.99119e-12	1.87513e-11	c0	SLC16A9	10	rs1171617	61137188	0	-0.378289	0.0516352	2.42993	2.44466	2.36813e-13	4.52445e-13	9.55253e-13	carnitine	SLC16A9
													10	rs10821962	63582841	0	0.414303	0.074611	1.83138	1.8951	2.81059e-08	4.0278e-08	6.68861e-08	1,3,7-trimethylurate	NA
													10	rs2147896	100138166	0	-1.03592	0.0351318	4.0385	4.07505	4.25678e-191	4.52169e-132	3.17066e-95	X- 12092	PYROXD2
													10	rs7068990	122078902	14	-0.346384	0.0608535	0.974124	0.980646	1.2549e-08	1.54969e-08	2.07438e-08	glycochenodeoxycholate	NA
11	rs174546	61326406	0	-0.0346342	0.00616637	5.26182	5.32577	1.94717e-08	2.53417e-08	3.52086e-08	pc ae c42 5	FADS1	11	rs174546	61326406	0	0.312893	0.0548817	1.5896	1.5975	1.18952e-08	1.43304e-08	1.86931e-08	1-linoleoylglycerophosphoethanolamine*	FADS1
11	rs174547	61327359	1	-0.0657954	0.00860021	5.83136	5.89255	2.00289e-14	4.58334e-14	1.17053e-13	lysopc a c20 4	FADS1	11	rs174547	61327359	1	-0.392622	0.0623212	0.363358	0.368254	2.97699e-10	4.87916e-10	8.66557e-10	1-arachidonoylglycerophosphocholine*	FADS1
11	rs174556	61337211	0	-0.0515279	0.00765964	5.19155	5.26582	1.7296e-11	2.99558e-11	5.62538e-11	pc aa c38 5	FADS1	11	rs174547	61327359	1	-0.324486	0.0523221	1.92133	1.93449	5.58579e-10	7.62242e-10	1.12936e-09	arachidote (20:4n6)	FADS1
11	rs1535	61354548	0	-0.0547007	0.00749083	6.61822	6.71396	2.82786e-13	5.96875e-13	1.374e-12	pc ae c36 5	FADS1
11	rs1535	61354548	0	-0.044602	0.00679269	8.92732	9.06914	5.16228e-11	8.1977e-11	1.41176e-10	pc ae c38 5	FADS1
11	rs174576	61360086	16	-0.0682351	0.00741785	7.45225	7.5663	3.62045e-20	2.37564e-19	1.63317e-18	pc aa c38 4	FADS1
11	rs174576	61360086	16	-0.0536694	0.00722043	6.23951	6.32859	1.06166e-13	2.31558e-13	5.52775e-13	pc aa c36 4	FADS1
11	rs174576	61360086	16	-0.0478558	0.00681926	4.78101	4.85799	2.25486e-12	4.18597e-12	8.48582e-12	pc ae c38 4	FADS1
													12	rs4149056	21222816	8	0.698831	0.0519439	1.55619	1.57475	2.93369e-41	2.44969e-37	1.00662e-33	X- 11529	SLCO1B1
													12	rs4149056	21222816	10	0.42319	0.0711901	2.87326	2.90068	2.77299e-09	3.68722e-09	5.35724e-09	hexadecanedioate	SLCO1B1
													12	rs4149081	21269288	3	0.498146	0.0675143	5.5307	5.58605	1.60243e-13	2.97506e-13	6.13727e-13	X- 11538	SLCO1B1
													12	rs2199680	21306763	14	0.476305	0.0730626	1.02554	1.05492	7.07136e-08	1.49902e-10	3.49702e-10	1-eicosadienoylglycerophosphocholine*	NA
													12	rs2199680	21306763	16	0.360927	0.062801	1.57437	1.60413	4.07529e-08	1.18301e-08	1.70889e-08	X- 13429	NA
													12	rs774211	55207206	0	-0.263695	0.0460356	3.93661	3.96431	1.01579e-08	1.22625e-08	1.60392e-08	gamma-glutamylglutamine	RBMS2
													12	rs774211	55207206	0	-0.328579	0.0588599	1.66954	1.68046	3.434e-08	2.85488e-08	3.69011e-08	glutamine	RBMS2
													12	rs11111539	102285422	20	0.288819	0.0520199	1.61712	1.62485	2.8229e-08	3.32245e-08	4.21392e-08	2-aminobutyrate	C12orf42
12	rs2066938	119644998	0	0.120216	0.00861474	3.48016	3.51574	2.94439e-44	6.06855e-40	4.16331e-36	c4	ACADS	12	rs2066938	119644998	0	1.00926	0.044185	3.7769	3.80063	1.76633e-115	1.67308e-91	1.08325e-73	butyrylcarnitine	ACADS
13	rs7995502	21310584	28	-0.0971203	0.0160768	8.50571	8.60167	1.53146e-08	1.96858e-09	2.78225e-09	pc ae c44 5	NA
13	rs7995502	21310584	28	-0.0882115	0.0150868	6.41007	6.47742	4.00684e-08	6.3462e-09	8.76624e-09	pc ae c44 6	NA
14	rs7157785	63305309	4	0.0457205	0.00831354	7.89042	8.01197	3.80834e-08	4.69544e-08	6.18493e-08	pc aa c28 1	SGPP1	14	rs7157785	63305309	4	0.450602	0.0592223	1.57444	1.5827	2.76962e-14	7.777e-14	2.35177e-13	1-stearoylglycerol (1-monostearin)	SGPP1
													14	rs7157785	63305309	4	0.380564	0.0626449	2.12336	2.13621	1.24042e-09	1.85609e-09	2.97314e-09	X- 10510	SGPP1
14	rs10131545	101529478	6	-0.0988748	0.0147823	6.83312	6.91755	2.25096e-11	3.38272e-11	5.67453e-11	sm oh c16 1	DYNC1H1
14	rs10131545	101529478	6	-0.0990517	0.0149345	7.85928	7.95539	3.30207e-11	4.71385e-11	7.57918e-11	pc ae c36 2	DYNC1H1
14	rs10131545	101529478	6	-0.0887137	0.0137971	4.74941	4.80493	1.27689e-10	1.8237e-10	2.8881e-10	sm oh c22 1	DYNC1H1
14	rs10131545	101529478	6	-0.0925628	0.014714	6.89486	6.97556	3.15847e-10	4.17179e-10	6.1477e-10	pc ae c34 2	DYNC1H1
14	rs10131545	101529478	6	-0.0884288	0.0142465	5.59815	5.6697	5.39898e-08	7.25004e-10	1.0742e-09	sm oh c22 2	DYNC1H1
14	rs10131545	101529478	6	-0.0864376	0.0140573	6.13697	6.22114	4.80106e-08	1.08152e-09	1.63493e-09	sm c18 1	DYNC1H1
14	rs10131545	101529478	6	-0.0885785	0.0145004	6.78562	6.86913	1.00443e-08	1.27928e-09	1.80893e-09	pc ae c36 3	DYNC1H1
14	rs10131545	101529478	6	-0.0915821	0.0153108	5.53078	5.59796	2.21059e-08	2.79361e-09	3.8851e-09	pc ae c40 6	DYNC1H1
14	rs10131545	101529478	6	-0.0877698	0.0147269	6.75588	6.83952	2.52501e-08	3.2305e-09	4.52488e-09	sm oh c14 1	DYNC1H1
14	rs10131545	101529478	6	-0.0786913	0.0135787	6.55634	6.64119	6.82442e-09	8.54759e-09	1.16535e-08	pc aa c36 2	DYNC1H1
14	rs10131545	101529478	6	-0.0786337	0.0138799	8.82648	8.94867	1.46773e-08	1.77953e-08	2.34356e-08	pc ae c34 1	DYNC1H1
14	rs10131545	101529478	6	-0.0855705	0.0154683	5.47537	5.54188	3.1664e-08	3.77601e-08	4.88038e-08	pc ae c38 6	DYNC1H1
14	rs7151151	101532665	0	-0.0789167	0.0126296	9.89173	10.0242	4.14295e-08	5.74657e-10	8.72775e-10	sm c16 0	DYNC1H1
14	rs7151151	101532665	0	-0.0803059	0.0129542	9.28344	9.41894	4.67422e-08	7.96755e-10	1.21682e-09	sm c16 1	DYNC1H1
14	rs7151151	101532665	0	-0.0825609	0.0134098	5.30178	5.37284	4.42507e-08	1.0166e-09	1.52358e-09	sm c18 0	DYNC1H1
14	rs7151151	101532665	0	-0.0807574	0.0133305	5.72033	5.79354	1.37751e-08	1.81018e-09	2.60998e-09	sm c24 0	DYNC1H1
14	rs7151151	101532665	0	-0.0909535	0.0152391	3.98358	4.02527	2.39518e-08	2.97638e-09	4.09005e-09	sm oh c24 1	DYNC1H1
14	rs7151151	101532665	0	-0.0780371	0.0132381	6.50228	6.58755	3.74946e-08	4.79593e-09	6.68935e-09	sm c24 1	DYNC1H1
													14	rs12587001	103671930	1	0.3953	0.0723105	0.394662	0.395637	4.585e-08	5.78083e-08	7.79667e-08	asparagine	NA
													15	rs2652822	61209825	17	-0.286991	0.0490242	2.3867	2.41355	4.79702e-08	6.8862e-09	1.08011e-08	succinylcarnitine	LACTB
													16	rs9924984	50368066	12	0.591325	0.107012	1e-05	1e-05	3.28025e-08	3.8508e-08	4.8734e-08	ornithine	NA
													16	rs10500488	62682725	23	0.269435	0.0493622	2.96675	2.99276	4.80664e-08	5.75787e-08	7.44267e-08	X- 14086	NA
													17	rs4316	58916041	19	-0.315978	0.0523862	1.78347	1.80624	1.62243e-08	2.22498e-09	3.40007e-09	X- 14208	ACE
													17	rs4329	58917190	0	-0.415302	0.0529443	3.99962	4.02841	4.35928e-15	9.53616e-15	2.34681e-14	aspartylphenylalanine	ACE
													19	rs11881242	40975687	0	-0.44317	0.0802352	1e-05	1e-05	3.32524e-08	3.9934e-08	5.2236e-08	1-palmitoylglycerophosphoinositol*	NA
													19	rs2547231	53076869	0	-0.588363	0.059022	4.77862	4.83057	2.09262e-23	2.85271e-22	3.82629e-21	X- 11440	SULT2A1
													19	rs2547231	53076869	0	-0.514398	0.0589319	4.96435	5.00907	2.5764e-18	1.1207e-17	5.21361e-17	X- 11244	SULT2A1
													20	rs2281557	5106729	12	-0.383489	0.0678866	1.72398	1.76713	1.61424e-08	2.16255e-08	3.2781e-08	thymol sulfate	CDS2
													22	rs165722	18329013	28	0.432923	0.0354438	3.60479	3.63436	2.60605e-34	6.21968e-32	1.13607e-29	X- 11593	COMT
